# Supplementary material for: Enhanced polarization from flexible hierarchical MnO2arrays on cotton cloth with excellent microwave absorption
Source: Royal Society of Chemistry journal article supplement (doi:10.1039/c9nr02667c), 2019-01-01
Supplement: c9nr02667c1.pdf [file c9nr02667c1.pdf]

# Enhanced Polarization from Flexible Hierarchical MnO<sub>2</sub> Arrays on the Cotton Cloth with Excellent Microwave Absorption

*Xiao Li, Lei Wang, Wenbin You, Linshen Xing, Liting Yang, Xuefeng Yu, Jie Zhang, Yuesheng Li, Renchao Che\**

Laboratory of Advanced Materials, Department of Materials Science and Collaborative Innovation Center of Chemistry for Energy Materials (iChem), Fudan University, Shanghai 200438, P. R. China

\*E-mail: [rcche@fudan.edu.cn](mailto:rcche@fudan.edu.cn)

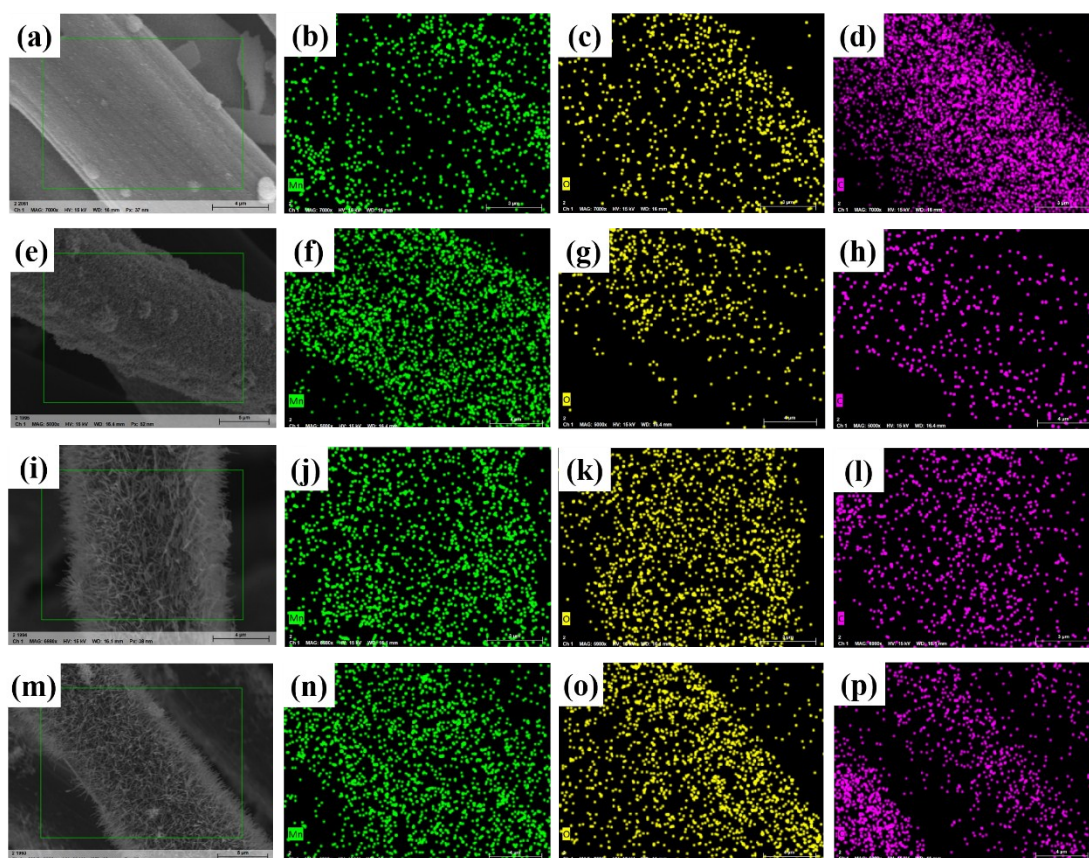

**Figure S1.** Elemental mapping of CC@MnO<sub>2</sub>-1 (a, b, c, d), CC@MnO<sub>2</sub>-2

(e, f, g, h), CC@MnO<sub>2</sub>-3 (i, j, k, l) and CC@MnO<sub>2</sub>-4 (m, n, o, p).

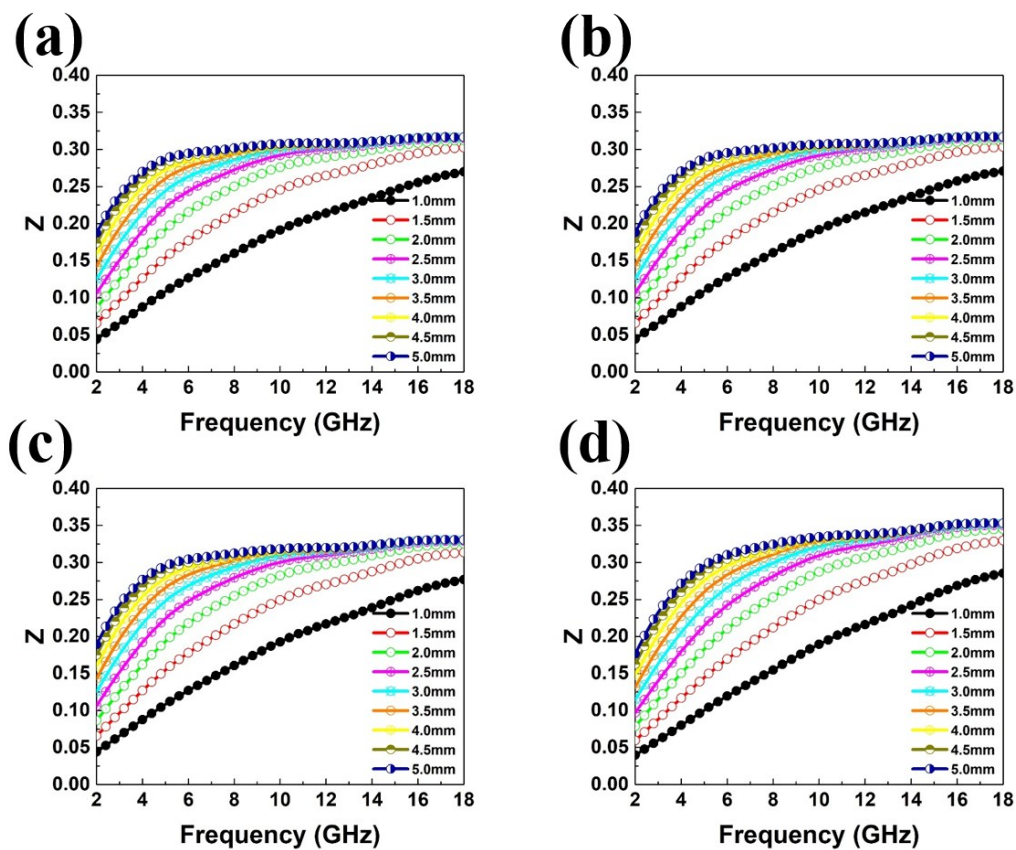

**Figure S2.** Impedance matching versus frequency for CC@MnO<sub>2</sub>-1 (a), CC@MnO<sub>2</sub>-2 (b), CC@MnO<sub>2</sub>-3 (c) and CC@MnO<sub>2</sub>-4 (d).

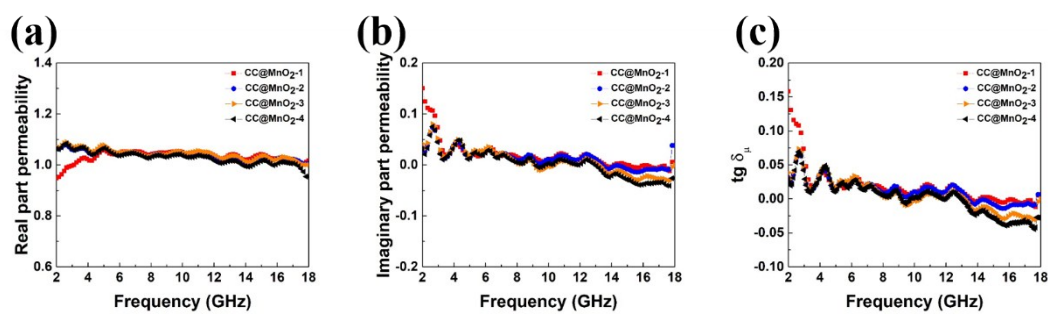

**Figure S3.** Real permeability  $\mu'$  (a), imaginary permeability  $\mu''$  (b) and  $\tan \delta_\mu$  (c) of the paraffin composites containing 25 wt.% CC@MnO<sub>2</sub>.

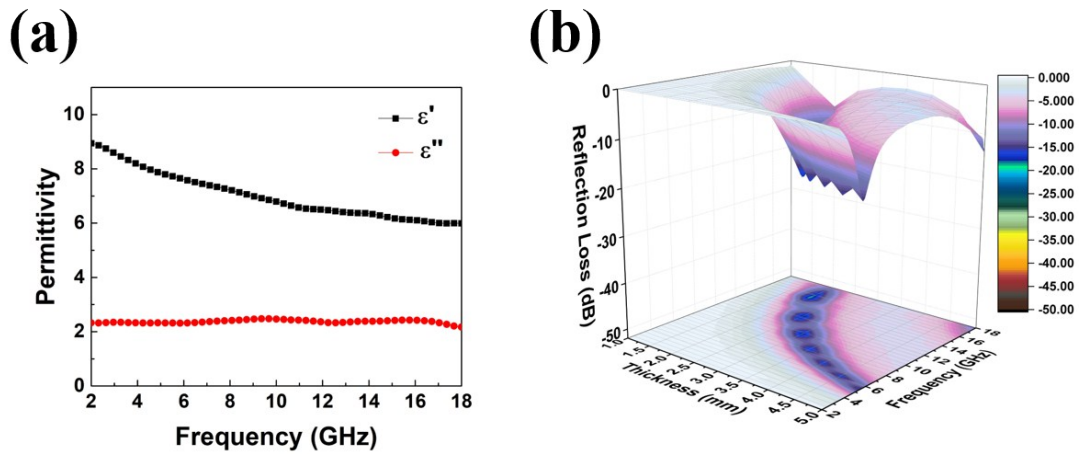

**Figure S4.** The permittivity (a) and frequency dependence of calculated 3D plots (b) for pure CC sample.

**Table S1.** Comparison of microwave absorption performance between the reported MnO<sub>2</sub>-based composites and the as-prepared CC@MnO<sub>2</sub>-4.

| absorber                                                          | maximum RL<br>(dB) | matching<br>frequency<br>(GHz) | absorption<br>band<br>(GHz) | refs       |
|-------------------------------------------------------------------|--------------------|--------------------------------|-----------------------------|------------|
| Hollow urchin-like MnO <sub>2</sub>                               | -41.0              | 8.7                            | -                           | S1         |
| MnO <sub>2</sub> @Fe-graphene                                     | -17.5              | 16                             | -                           | S2         |
| Graphene@Fe <sub>3</sub> O <sub>4</sub> @carbon@ MnO <sub>2</sub> | -38.8              | 15                             | 5.4                         | S3         |
| Polydopamine@MnO <sub>2</sub>                                     | -21.8              | 9.68                           | 3.28                        | S4         |
| Carbonyl iron@MnO <sub>2</sub>                                    | -39.1              | 4.4                            | -                           | S5         |
| Fe <sub>3</sub> O <sub>4</sub> @MnO <sub>2</sub>                  | -42.6              | 5.7                            | 6.7                         | S6         |
| MnO <sub>2</sub> -reduced graphene oxide                          | -37                | 16.8                           | -                           | S7         |
| Fe <sub>2</sub> O <sub>3</sub> @C@MnO <sub>2</sub>                | -45                | 9.36                           | 3.99                        | S8         |
| <b>CC@ MnO<sub>2</sub></b>                                        | <b>-53.2</b>       | <b>5.44</b>                    | <b>5.84</b>                 | <b>our</b> |

## REFERENCES:

- S1. M. Zhou, X. Zhang, J. Wei, S. Zhao, L. Wang and B. Feng, *J. Phys. Chem. C*, 2011, **115**, 1398-1402.
- S2. H. Lv, G. Ji, X. Liang, H. Zhang and Y. Du, *J. Mater. Chem. C*, 2015, **3**, 5056-5064.
- S3. L. Wang, Y. Huang, C. Li, J. Chena and X. Sun, *Phys. Chem. Chem. Phys.*, 2015, **17**, 5878-5886.
- S4. W. She, H. Bi, Z. Wen, Q. Liu, X. Zhao, J. Zhang and R. Che, *ACS Appl. Mater. Interfaces*, 2016, **8**, 9782-9789.
- S5. W. Zhang, S. Bie, H. Chen, Y. Lu and J. Jiang, *J. Magn. Magn. Mater.*, 2014, **358**, 1-4.
- S6. M. Qiao, X. Lei, Y. Ma, L. Tian, W. Wang, K. Su and Q. Zhang, *J. Alloy. Compd.*, 2017, **693**, 432-439.
- S7. Y. Wang, H. Guan, S. Du and Y. Wang, *RSC Adv.*, 2015, **5**, 88979-88988.
- S8. W. You, H. Bi, W. She, Y. Zhang and R. Che, *Small*, 2017, **13**, 16027791-16027798.
